# Supplementary material
Source: HighWire-hosted journal article supplement (https://nutrition.bmj.com/content/6/2/122)
Supplement: inline-supplementary-material-1 [file inline-supplementary-material-1.pdf]

## data

| id | sex | age | height | weight | bmi  | mgperkg | reportedss | aph1 | aph2 | aph3 | aco21 | aco22 | aco23 | ahco1 | ahco2 | ahco3 | mph1 | mph2 | mph3 | mco21 | mco22 | mco23 | mhco1 | mhco2 | mhco3 |
|----|-----|-----|--------|--------|------|---------|------------|------|------|------|-------|-------|-------|-------|-------|-------|------|------|------|-------|-------|-------|-------|-------|-------|
| 1  | m   | 35  | 1.8    | 75     | 22.1 | 133     | 0          | 7.43 | 7.45 | 7.45 | 40    | 41    | 39    | 26    | 28    | 27    | 7.39 | 7.41 | 7.41 | 45    | 46    | 44    | 27    | 29    | 28    |
| 2  | f   | 26  | 1.61   | 58     | 21.1 | 172     | 0          | 7.41 | 7.46 | 7.42 | 36    | 29    | 41    | 22    | 21    | 25    | 7.37 | 7.42 | 7.38 | 41    | 34    | 46    | 24    | 22    | 27    |
| 3  | m   | 25  | 1.75   | 67     | 20.1 | 149     | 2          | 7.42 | 7.42 | 7.41 | 42    | 39    | 36    | 27    | 24    | 22    | 7.38 | 7.38 | 7.37 | 47    | 44    | 41    | 28    | 26    | 24    |
| 4  | m   | 25  | 1.76   | 68     | 20.1 | 147     | 1          | 7.39 | 7.41 | 7.42 | 45    | 43    | 37    | 26    | 26    | 23    | 7.35 | 7.37 | 7.38 | 50    | 48    | 42    | 27    | 27    | 25    |
| 5  | f   | 23  | 1.55   | 60     | 23.1 | 167     | 4          | 7.32 | 7.44 | 7.42 | 41    | 38    | 41    | 28    | 26    | 25    | 7.28 | 7.4  | 7.38 | 46    | 43    | 46    | 30    | 27    | 27    |
| 6  | f   | 25  | 1.68   | 63     | 21.1 | 159     | 0          | 7.47 | 7.47 | 7.46 | 36    | 35    | 36    | 26    | 25    | 25    | 7.43 | 7.43 | 7.42 | 41    | 40    | 41    | 27    | 27    | 26    |
| 7  | m   | 36  | 1.74   | 83     | 26.1 | 120     | 2          | 7.37 | 7.39 | 7.4  | 45    | 47    | 45    | 25    | 27    | 27    | 7.33 | 7.35 | 7.36 | 50    | 52    | 50    | 26    | 29    | 28    |
| 8  | m   | 36  | 1.84   | 119    | 3.2  | 84      | 0          | 7.4  | 7.38 | 7.42 | 42    | 44    | 36    | 25    | 25    | 23    | 7.36 | 7.34 | 7.38 | 47    | 49    | 41    | 26    | 26    | 24    |
| 9  | m   | 52  | 1.76   | 76     | 23.1 | 132     | 6          | 7.39 | 7.36 | 7.4  | 39    | 47    | 40    | 23    | 25    | 24    | 7.35 | 7.32 | 7.36 | 44    | 52    | 45    | 25    | 27    | 26    |
| 10 | m   | 62  | 1.72   | 72     | 23.1 | 139     | 1          | 7.45 | 7.42 | 7.4  | 36    | 43    | 42    | 24    | 26    | 25    | 7.41 | 7.38 | 7.36 | 41    | 48    | 47    | 26    | 28    | 27    |
| 11 | m   | 24  | 1.8    | 65     | 19.1 | 154     | 2          | 7.39 | 7.37 | 7.42 | 46    | 50    | 45    | 26    | 28    | 28    | 7.35 | 7.33 | 7.38 | 51    | 55    | 50    | 28    | 29    | 29    |
| 12 | f   | 27  | 1.61   | 78     | 29.1 | 128     | 2          | 7.39 | 7.43 | 7.42 | 37    | 34    | 35    | 22    | 22    | 22    | 7.35 | 7.39 | 7.38 | 42    | 39    | 40    | 23    | 24    | 24    |
| 13 | f   | 42  | 1.58   | 59     | 22.1 | 169     | 1          | 7.44 | 7.44 | 7.45 | 36    | 36    | 31    | 24    | 24    | 21    | 7.4  | 7.4  | 7.41 | 41    | 41    | 36    | 25    | 25    | 22    |
| 14 | f   | 49  | 1.59   | 68     | 25.1 | 147     | 2          | 7.38 | 7.44 | 7.41 | 40    | 41    | 44    | 27    | 27    | 27    | 7.34 | 7.4  | 7.37 | 45    | 46    | 49    | 29    | 28    | 28    |
| 15 | m   | 42  | 1.78   | 82     | 24.1 | 122     | 4          | 7.44 | 7.47 | 7.41 | 39    | 34    | 41    | 26    | 25    | 25    | 7.4  | 7.43 | 7.37 | 44    | 39    | 46    | 27    | 26    | 27    |
| 16 | m   | 63  | 1.8    | 83     | 24.1 | 120     | 0          | 7.46 | 7.44 | 7.44 | 40    | 42    | 36    | 27    | 28    | 24    | 7.42 | 7.4  | 7.4  | 45    | 47    | 41    | 29    | 30    | 25    |
| 17 | f   | 40  | 1.65   | 74     | 26.1 | 135     | 1          | 7.42 | 7.44 | 7.42 | 29    | 35    | 33    | 18    | 23    | 21    | 7.38 | 7.4  | 7.38 | 34    | 40    | 38    | 20    | 25    | 23    |
| 18 | f   | 41  | 1.54   | 58     | 23.1 | 172     | 1          | 7.39 | 7.42 | 7.45 | 43    | 38    | 36    | 25    | 24    | 24    | 7.35 | 7.38 | 7.41 | 48    | 43    | 41    | 26    | 25    | 26    |
| 19 | f   | 44  | 1.56   | 52     | 20.1 | 192     | 0          | 7.42 | 7.46 | 7.44 | 30    | 31    | 36    | 19    | 22    | 24    | 7.38 | 7.42 | 7.4  | 35    | 36    | 41    | 21    | 24    | 25    |
| 20 | f   | 58  | 1.6    | 54     | 20.1 | 185     | 0          | 7.47 | 7.43 | 7.42 | 41    | 29    | 35    | 29    | 19    | 24    | 7.43 | 7.39 | 7.38 | 46    | 34.4  | 40    | 31    | 21    | 26    |
| 21 | f   | 51  | 1.6    | 62     | 23.1 | 161     | 1          | 7.43 | 7.35 | 7.51 | 38    | 44    | 29    | 24    | 23    | 23    | 7.39 | 7.31 | 7.47 | 43    | 49    | 34    | 26    | 25    | 25    |
| 22 | m   | 56  | 1.71   | 78     | 25.1 | 128     | 0          | 7.4  | 7.44 | 7.51 | 44    | 38    | 30    | 26    | 25    | 24    | 7.36 | 7.4  | 7.47 | 49    | 43    | 34    | 28    | 26    | 25    |
| 23 | f   | 63  | 1.55   | 76     | 30.1 | 132     | 1          | 7.43 | 7.48 | 7.41 | 40    | 33    | 36    | 26    | 25    | 26    | 7.39 | 7.44 | 7.37 | 45    | 38    | 40    | 27    | 26    | 28    |
| 24 | f   | 59  | 1.64   | 74     | 26.1 | 135     | 0          | 7.44 | 7.43 | 7.45 | 36    | 34    | 28    | 26    | 27    | 26    | 7.4  | 7.39 | 7.41 | 41    | 39    | 33    | 27    | 28    | 27    |
